# Supplementary material for: Controlled human hookworm infection remodels plasmacytoid dendritic cells and regulatory T cells towards profiles seen in natural infections in endemic areas
Source: PubMed Central journal article supplement (PMC11252261; doi:10.1038/s41467-024-50313-0), 2024-07-16
Supplement: 41467_2024_50313_MOESM1_ESM.pdf [file 41467_2024_50313_MOESM1_ESM.pdf]

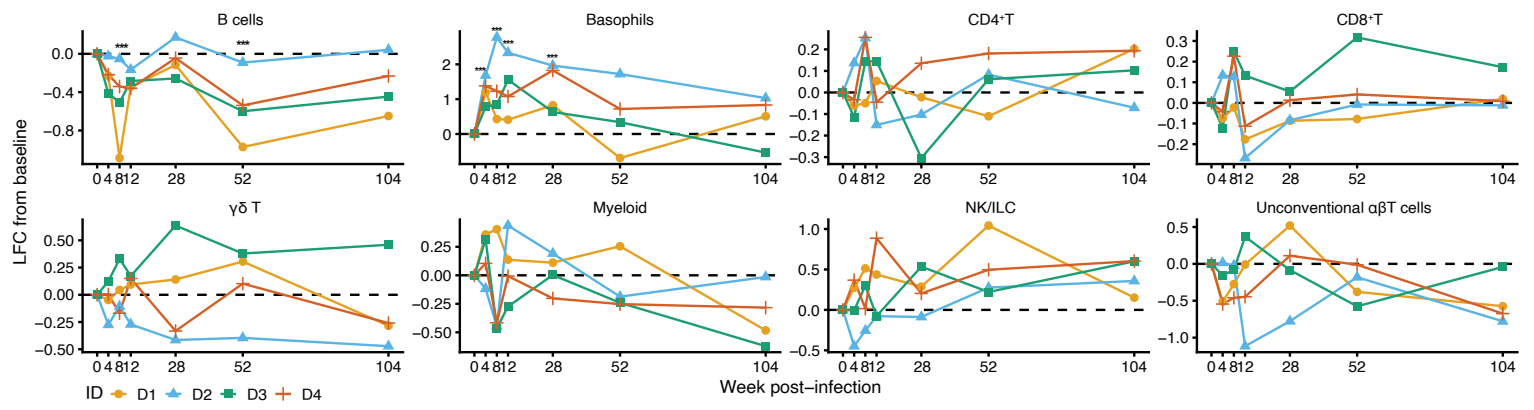

**Figure S1. Changes in lineage frequencies.** Frequencies of immune cell lineages were calculated relative to total CD45<sup>+</sup> cells and log-fold change (LFC) were calculated relative to the baseline frequencies. Colors and shapes indicated distinct individuals (ID) and paired measurements were indicated with lines connecting data points. Lineage frequencies at post-infection timepoints were tested against the baseline (week 0) using binomial linear mixed models. P-values were Dunnett-corrected for multiple comparisons. \*\*\* P < 0.001.

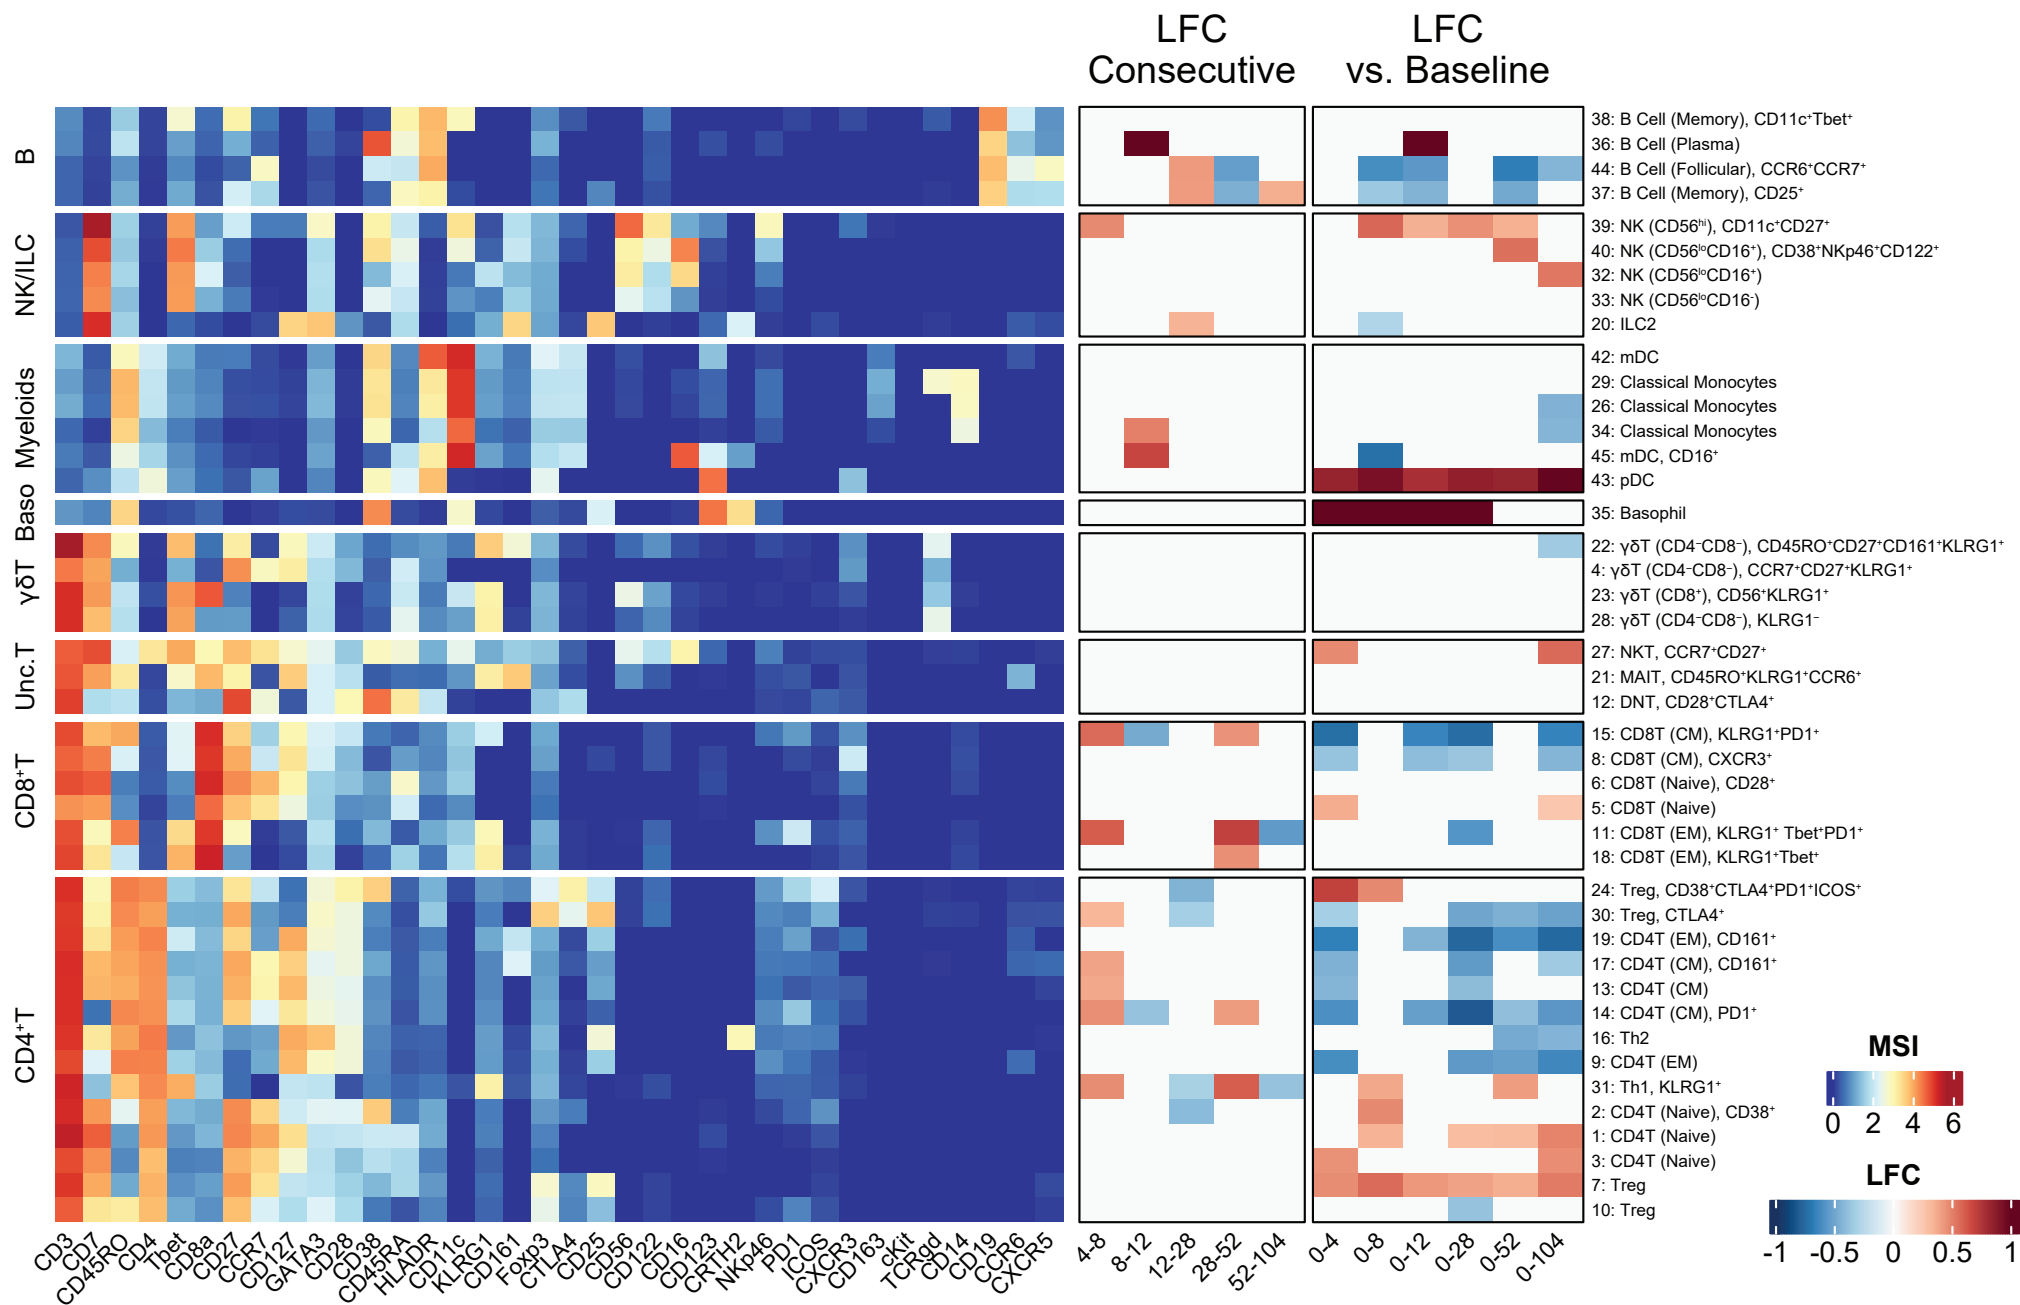

**Figure S2. Summary heatmaps of changes in FlowSOM cluster frequencies stratified by lineage.** Left: heatmap showing median signal intensity (MSI) of marker expression. Right: heatmaps of log-fold change (LFC) of cluster frequencies for comparisons against baseline (left panel) or consecutive time points (right panel). FlowSOM cluster frequencies were calculated relative to total CD45<sup>+</sup> and frequencies across timepoints compared using binomial linear mixed models. FDR correction was performed using the 'global' FDR method. LFC with FDR  $\geq 0.05$  were removed from the heatmap. Unc. T, Unconventional  $\alpha\beta$  T cells; Baso, Basophils.

### Gating $T_{reg}$ and $CD38^{hi}CD4^{+}T$

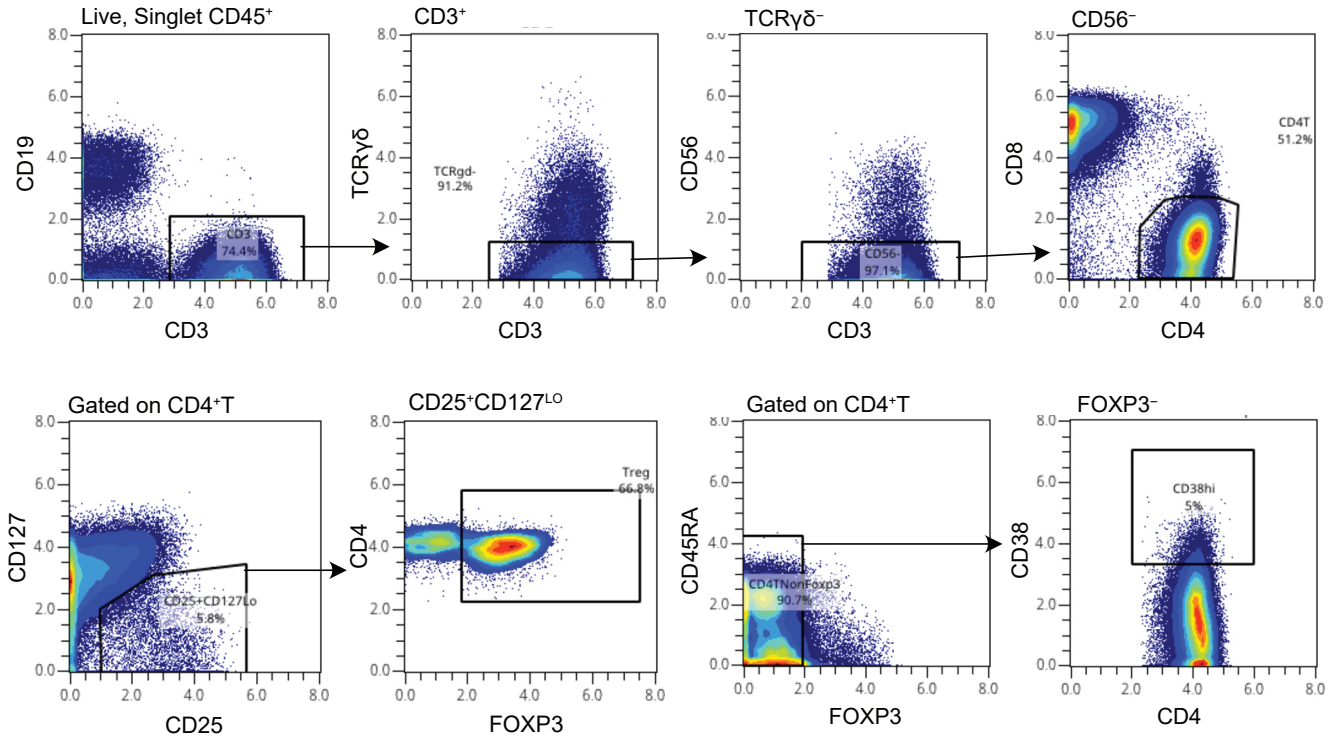

### Gating pDC and Basophils

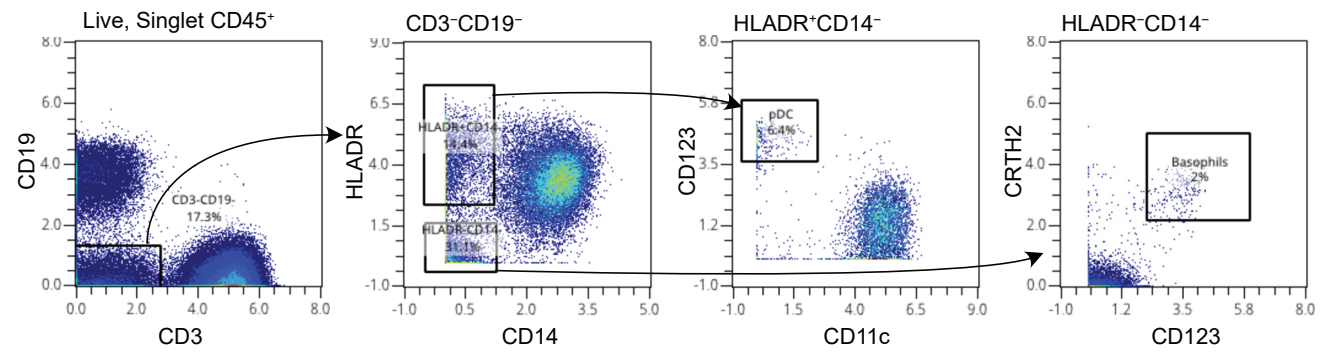

Figure S3. Gating strategies of specific immune cell subsets from mass cytometry data.

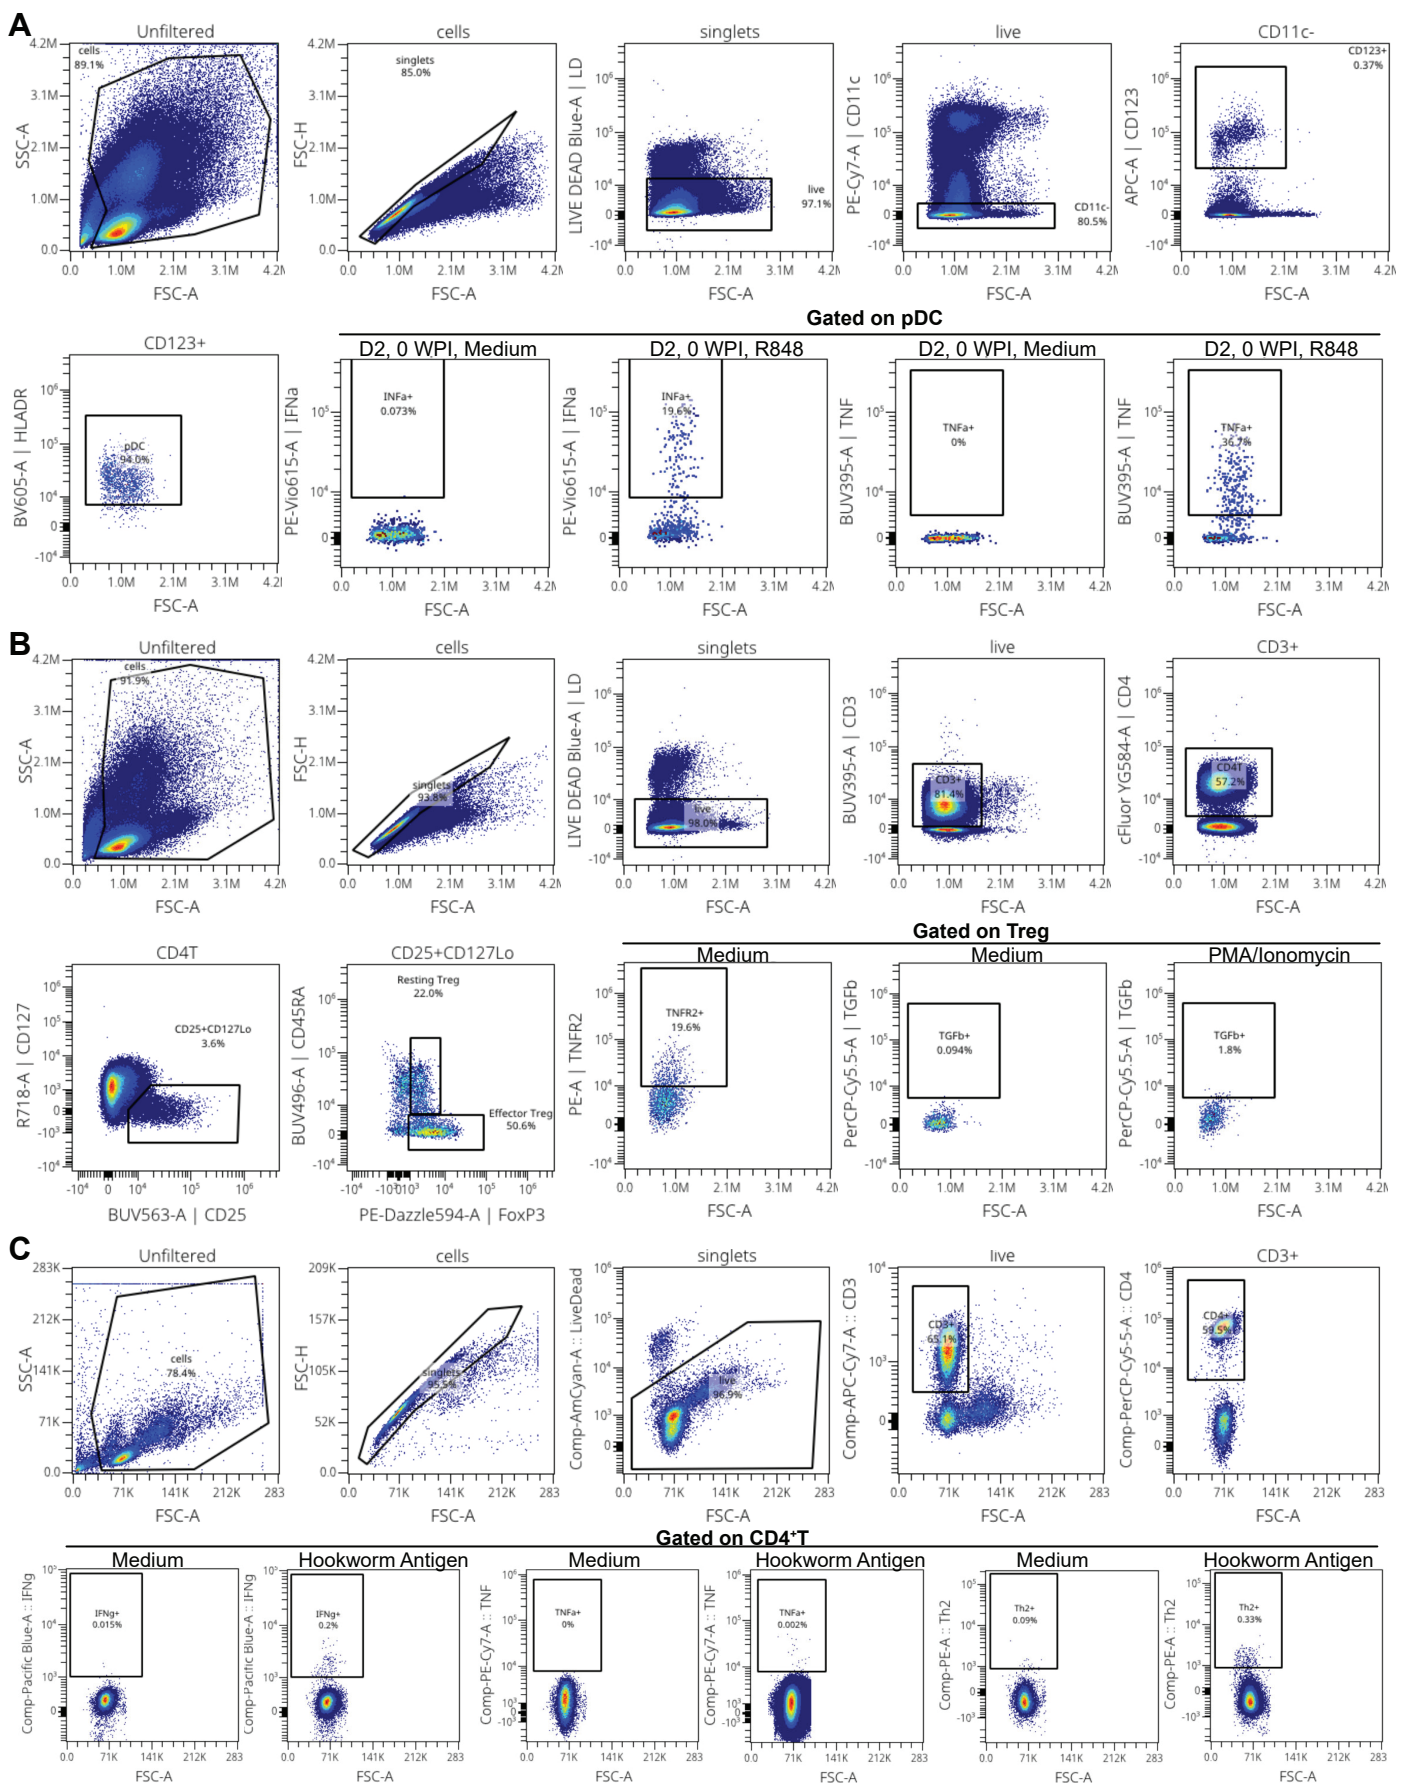

Figure S4. Gating strategies of flow cytometry intracellular cytokine staining data. **(A)** gating of IFN $\gamma$ - and TNF-producing pDC after TLR7/8 activation with R848. **(B)** gating of regulatory T cells (T $_{reg}$ ) expressing TNFR2 and TGF-1 latency- associated peptide (LAP). **(C)** gating of CD4 $^{+}$ T cells producing cytokines after stimulation with hookworm crude antigen extract.

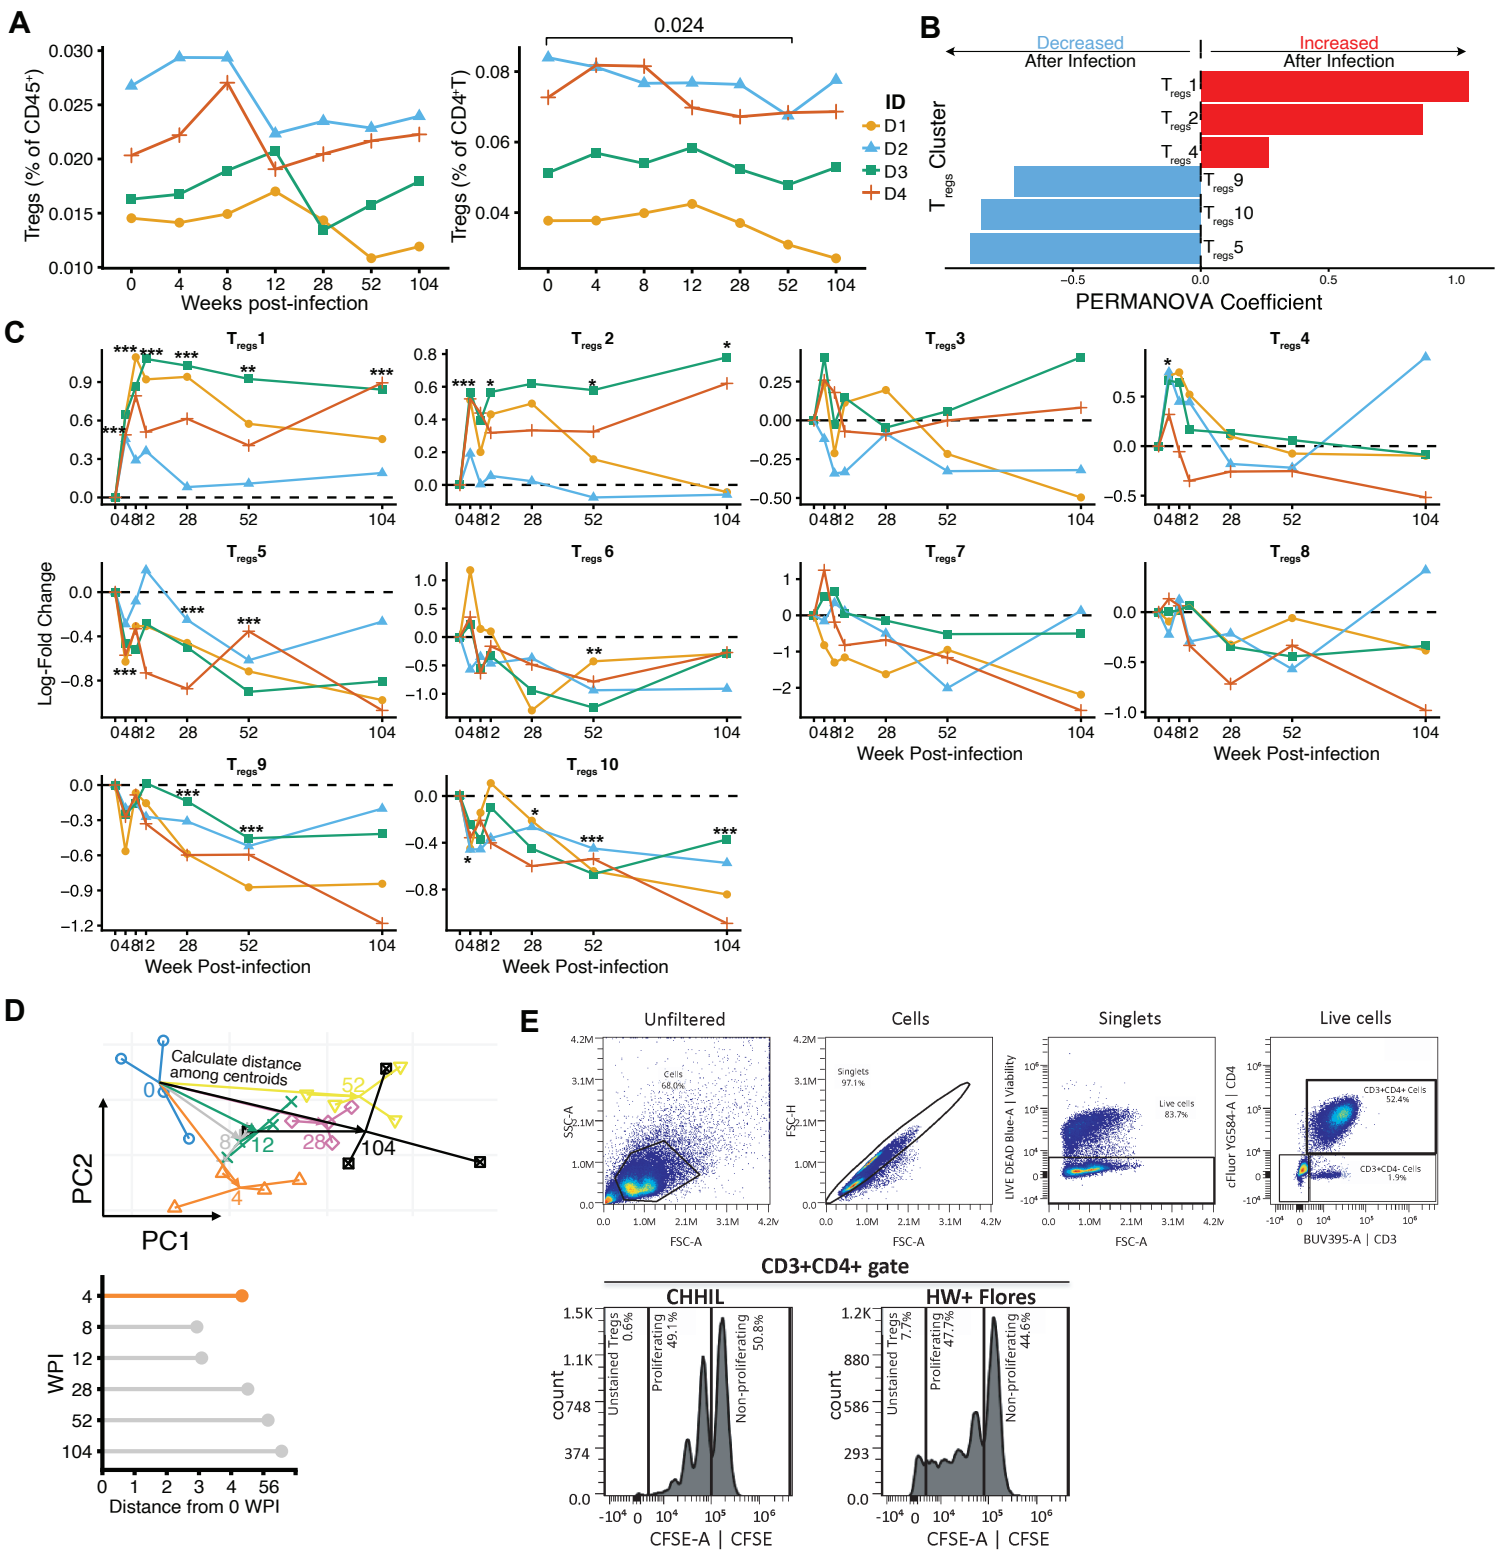

**Figure S5. Regulatory T cells.** (A) Frequencies of manually gated regulatory T cells ( $T_{\text{regs}}$ ,  $CD25^+$   $Foxp3^+$   $CD127^{\text{Lo/L}}$   $CD4^+$  T cells) relative to total  $CD45^+$  (top) or  $CD4^+$  T cells (bottom). P-values were obtained using binomial linear mixed effect models and Dunnet-corrected for multiple comparisons. (B) PERMANOVA coefficient of top-3  $T_{\text{regs}}$  clusters for each direction of change.  $T_{\text{regs}}$  cluster frequencies were calculated relative to  $CD4^+$  T cells, within-subject mean-centered, scaled, and then analysed using PERMANOVA. (C) Changes in  $T_{\text{regs}}$  cluster frequencies (relative to  $CD4^+$  T cells) relative to baseline, visualised as log-fold change (LFC). FDR correction was performed using the 'global' FDR method. \*\*\* FDR < 0.001, \*\* FDR < 0.01, \* FDR < 0.05. (D) Average difference in  $T_{\text{regs}}$  composition profile compared to baseline (0 WPI). Centroids were defined as the center of samples in each time point in the principal component (PC) space. Euclidean distance between the centroids were then considered as the average distance among Tregs profiles. (E) Gating strategy for  $T_{\text{regs}}$  suppression assay. After gating live, singlet,  $CD3^+$   $CD4^+$  T cells, CFSE staining was evaluated to distinguish unstained  $T_{\text{regs}}$ , proliferating T responders, and non-proliferating T responders. Shown above are the representative CFSE staining in a CHHIL donor and HW<sup>+</sup> Flores donor.

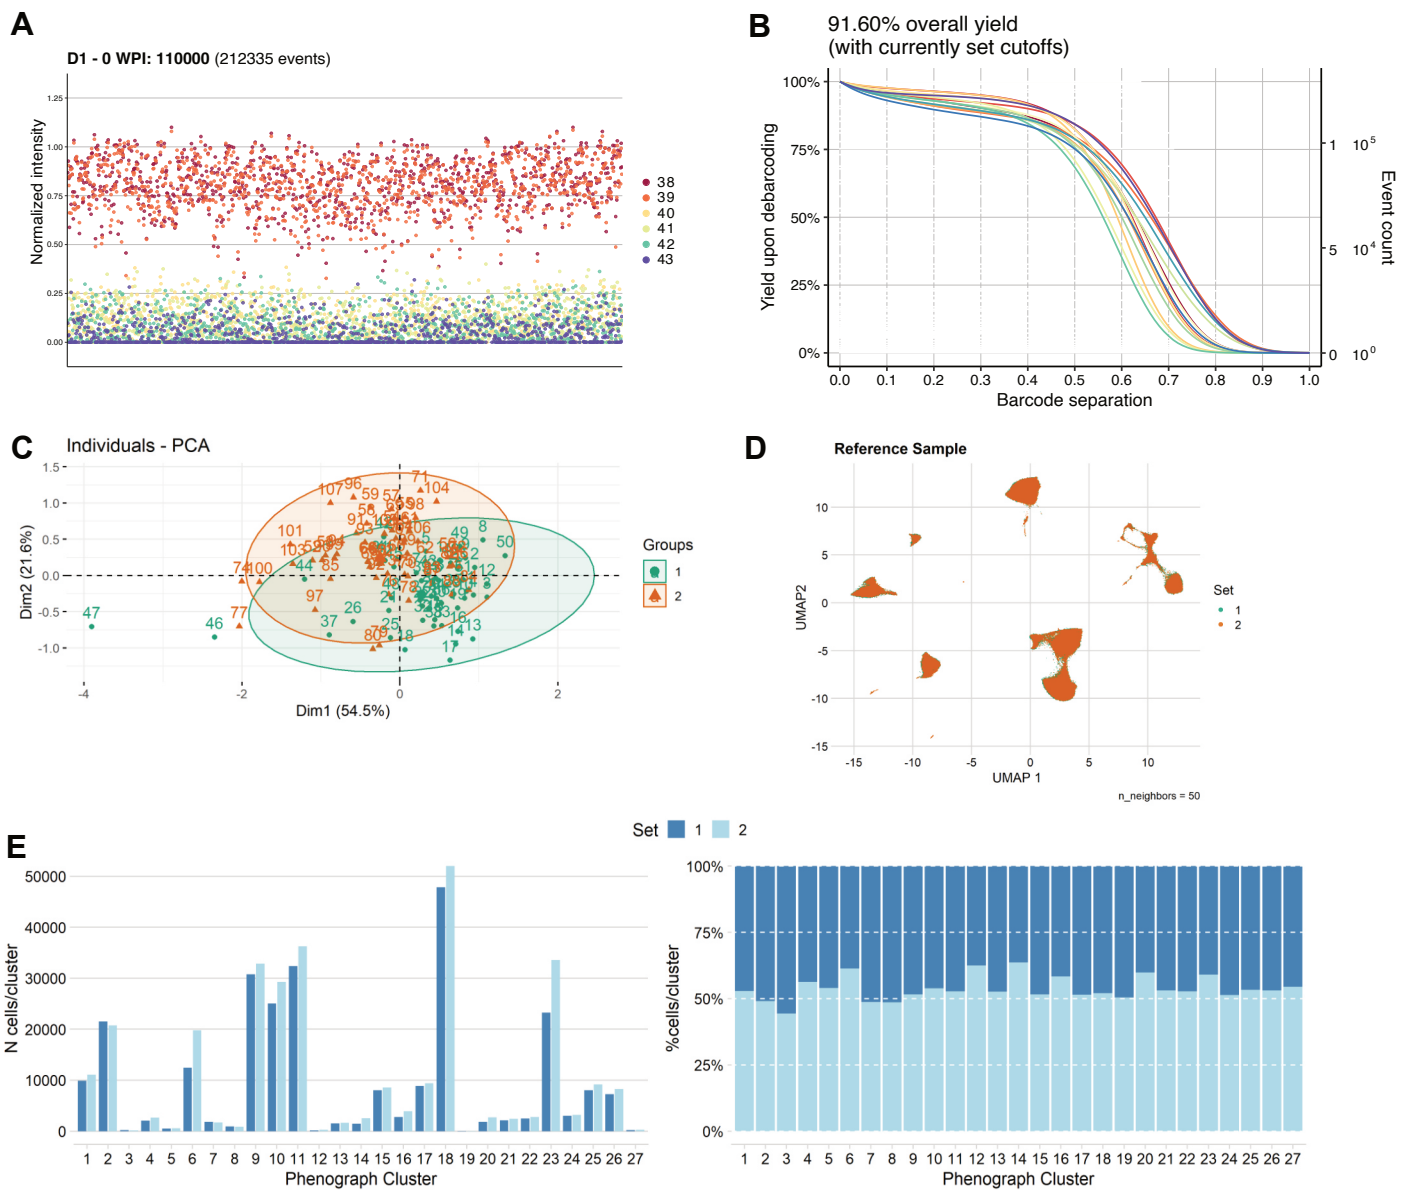

Figure S6. **Mass cytometry data debarcoding and quality control.** (A) Representative plot of  $B_2M$  barcode signal intensity. (B) Estimated cell yield after barcode deconvolution. (C) PCA of median signal intensity of all markers from reference samples for the two measurement batches. (D) UMAP embedding of downsampled cells (50,000 cells per sample) from the reference samples. (E) Relative proportion of cell clusters of the reference sample from the two batches showing comparable proportion of samples from both references in all clusters, indicating lack of or minimal batch effect between measurements. Clusters were obtained using the RPhenograph package with  $k = 50$ .

**Table S1. Mass cytometry antibody panel**

| <b>Label</b>      | <b>Target</b>    | <b>Clone</b> | <b>Source</b> | <b>Catalogue</b> | <b>Dilution</b> | <b>Information</b> |
|-------------------|------------------|--------------|---------------|------------------|-----------------|--------------------|
| <sup>106</sup> Cd | B <sub>2</sub> M | 2M2          | BioLegend     | 316302           | 1/50            | Barcoding          |
| <sup>110</sup> Cd | B <sub>2</sub> M | 2M2          | BioLegend     | 316302           | 1/50            | Barcoding          |
| <sup>111</sup> Cd | B <sub>2</sub> M | 2M2          | BioLegend     | 316302           | 1/50            | Barcoding          |
| <sup>112</sup> Cd | B <sub>2</sub> M | 2M2          | BioLegend     | 316302           | 1/50            | Barcoding          |
| <sup>114</sup> Cd | B <sub>2</sub> M | 2M2          | BioLegend     | 316302           | 1/50            | Barcoding          |
| <sup>116</sup> Cd | B <sub>2</sub> M | 2M2          | BioLegend     | 316302           | 1/50            | Barcoding          |
| <sup>89</sup> Y   | CD45             | HI30         | Fluidigm      | 3089003B         | 1/100           | Surface            |
| <sup>115</sup> In | CD45RA           | HI100        | BioLegend     | 304102           | 1/100           | Surface            |
| <sup>141</sup> Pr | CD196 (CCR6)     | G034E3       | Fluidigm      | 3141003A         | 1/400           | Surface            |
| <sup>142</sup> Nd | CD19             | HIB19        | Fluidigm      | 3142001B         | 1/200           | Surface            |
| <sup>143</sup> Nd | CD117 (c-Kit)    | 104D2        | BioLegend     | 313202           | 1/100           | Surface            |
| <sup>145</sup> Nd | CD4              | RPA-T4       | BioLegend     | 300541           | 1/200           | Surface            |
| <sup>146</sup> Nd | CD8a             | RPA-T8       | BioLegend     | 301053           | 1/200           | Surface            |
| <sup>147</sup> Sm | CD183 (CXCR3)    | G025H7       | BioLegend     | 353733           | 1/100           | Surface            |
| <sup>148</sup> Nd | CD14             | M5E2         | BioLegend     | 301843           | 1/100           | Surface            |
| <sup>149</sup> Sm | CD25 (IL-2Ra)    | 2A3          | Fluidigm      | 3149010B         | 1/100           | Surface            |
| <sup>150</sup> Nd | CD185 (CXCR5)    | J252D4       | BioLegend     | 356902           | 1/100           | Surface            |
| <sup>151</sup> Eu | CD123            | 6H6          | BioLegend     | 306027           | 1/200           | Surface            |
| <sup>152</sup> Sm | TCRγδ            | 11F2         | Fluidigm      | 3152008B         | 1/50            | Surface            |
| <sup>153</sup> Eu | CD7              | CD7-6B7      | BioLegend     | 343111           | 1/200           | Surface            |
| <sup>154</sup> Sm | CD163            | GHI/61       | BioLegend     | 333602           | 1/100           | Surface            |
| <sup>155</sup> Gd | CD278 (ICOS)     | C398.4A      | BioLegend     | 313502           | 1/50            | Surface            |
| <sup>156</sup> Gd | CD294 (CRTH2)    | BM16         | BioLegend     | 350102           | 1/100           | Surface            |
| <sup>158</sup> Gd | CD122 (IL-2Rb)   | TU27         | BioLegend     | 339015           | 1/100           | Surface            |
| <sup>159</sup> Tb | CD197 (CCR7)     | G043H7       | BioLegend     | 353237           | 1/100           | Surface            |
| <sup>161</sup> Dy | KLRG1 (MAFA)     | REA261       | Miltenyi      | Special order    | 1/200           | Surface            |
| <sup>162</sup> Dy | CD11c            | Bu15         | BioLegend     | 337221           | 1/100           | Surface            |
| <sup>164</sup> Dy | CD161            | HP-3G10      | BioLegend     | 339919           | 1/100           | Surface            |
| <sup>165</sup> Ho | CD127 (IL-7Ra)   | AO19D5       | Fluidigm      | 3165008B         | 1/200           | Surface            |
| <sup>167</sup> Er | CD27             | O323         | BioLegend     | 302839           | 1/200           | Surface            |
| <sup>168</sup> Er | HLA-DR           | L243         | BioLegend     | 307651           | 1/200           | Surface            |
| <sup>170</sup> Er | CD3              | UCHT1        | Fluidigm      | 3170001B         | 1/100           | Surface            |
| <sup>171</sup> Yb | CD28             | CD28.2       | BioLegend     | 302937           | 1/100           | Surface            |
| <sup>172</sup> Yb | CD38             | HIT2         | BioLegend     | 303535           | 1/200           | Surface            |
| <sup>173</sup> Yb | CD45RO           | UCHL1        | BioLegend     | 304239           | 1/100           | Surface            |
| <sup>174</sup> Yb | CD335 (NKp46)    | 92E          | BioLegend     | 331902           | 1/100           | Surface            |
| <sup>175</sup> Lu | CD279 (PD-1)     | EH12.2H7     | BioLegend     | 329941           | 1/100           | Surface            |
| <sup>176</sup> Yb | CD56             | NCAM16.2     | Fluidigm      | 3176008B         | 1/200           | Surface            |
| <sup>209</sup> Bi | CD16             | 3G8          | Fluidigm      | 3209002B         | 1/200           | Surface            |
| <sup>169</sup> Tm | GATA3            | REA174       | Miltenyi      | 130-108-061      | 1/50            | Intranuclear       |
| <sup>166</sup> Er | Tbet             | 4B10         | BioLegend     | 644825           | 1/100           | Intranuclear       |
| <sup>163</sup> Dy | CD152 (CTLA-4)   | BNI3         | BioLegend     | 369602           | 1/100           | Intranuclear       |
| <sup>160</sup> Gd | Foxp3            | PCH101       | eBioscience   | 14-4776-82       | 1/50            | Intranuclear       |

Table S2. Mass cytometry FlowSOM cluster annotation.

| Cluster | Lineage                  | Subset                                           | Annotation                                                                                                                |
|---------|--------------------------|--------------------------------------------------|---------------------------------------------------------------------------------------------------------------------------|
| 36      | B cells                  | Plasma cells                                     | 36: B Cell (Plasma)                                                                                                       |
| 37      | B cells                  | Memory B cells                                   | 37: B Cell (Memory), CD25 <sup>+</sup>                                                                                    |
| 38      | B cells                  | Memory B cells                                   | 38: B Cell (Memory), CD11c <sup>+</sup> Tbet <sup>+</sup>                                                                 |
| 44      | B cells                  | Follicular B cells                               | 44: B Cell (Follicular), CCR6 <sup>+</sup> CCR7 <sup>+</sup>                                                              |
| 35      | Basophils                | Basophil                                         | 35: Basophil                                                                                                              |
| 1       | CD4 <sup>+</sup> T       | CD4 <sup>+</sup> T (Naive)                       | 1: CD4 <sup>+</sup> T (Naive)                                                                                             |
| 2       | CD4 <sup>+</sup> T       | CD4 <sup>+</sup> T (Naive)                       | 2: CD4 <sup>+</sup> T (Naive), CD38 <sup>+</sup>                                                                          |
| 3       | CD4 <sup>+</sup> T       | CD4 <sup>+</sup> T (Naive)                       | 3: CD4 <sup>+</sup> T (Naive)                                                                                             |
| 7       | CD4 <sup>+</sup> T       | T <sub>reg</sub>                                 | 7: T <sub>reg</sub>                                                                                                       |
| 9       | CD4 <sup>+</sup> T       | CD4 <sup>+</sup> T (EM)                          | 9: CD4 <sup>+</sup> T (EM)                                                                                                |
| 10      | CD4 <sup>+</sup> T       | T <sub>reg</sub>                                 | 10: T <sub>reg</sub>                                                                                                      |
| 13      | CD4 <sup>+</sup> T       | CD4 <sup>+</sup> T (CM)                          | 13: CD4 <sup>+</sup> T (CM)                                                                                               |
| 14      | CD4 <sup>+</sup> T       | CD4 <sup>+</sup> T (CM)                          | 14: CD4 <sup>+</sup> T (CM), PD1 <sup>+</sup>                                                                             |
| 16      | CD4 <sup>+</sup> T       | T <sub>H2</sub>                                  | 16: T <sub>H2</sub>                                                                                                       |
| 17      | CD4 <sup>+</sup> T       | CD4 <sup>+</sup> T (CM)                          | 17: CD4 <sup>+</sup> T (CM), CD161 <sup>+</sup>                                                                           |
| 19      | CD4 <sup>+</sup> T       | CD4 <sup>+</sup> T (EM)                          | 19: CD4 <sup>+</sup> T (EM), CD161 <sup>+</sup>                                                                           |
| 24      | CD4 <sup>+</sup> T       | T <sub>reg</sub>                                 | 24: T <sub>reg</sub> , CD38 <sup>+</sup> CTLA4 <sup>+</sup> PD1 <sup>+</sup> ICOS <sup>+</sup>                            |
| 30      | CD4 <sup>+</sup> T       | T <sub>reg</sub>                                 | 30: T <sub>reg</sub> , CTLA4 <sup>+</sup>                                                                                 |
| 31      | CD4 <sup>+</sup> T       | T <sub>H1</sub>                                  | 31: T <sub>H1</sub> , KLRG1 <sup>+</sup>                                                                                  |
| 5       | CD8 <sup>+</sup> T       | CD8 <sup>+</sup> T (Naive)                       | 5: CD8 <sup>+</sup> T (Naive)                                                                                             |
| 6       | CD8 <sup>+</sup> T       | CD8 <sup>+</sup> T (Naive)                       | 6: CD8 <sup>+</sup> T (Naive), CD28 <sup>+</sup>                                                                          |
| 8       | CD8 <sup>+</sup> T       | CD8 <sup>+</sup> T (CM)                          | 8: CD8 <sup>+</sup> T (CM), CXCR3 <sup>+</sup>                                                                            |
| 11      | CD8 <sup>+</sup> T       | CD8 <sup>+</sup> T (EM)                          | 11: CD8 <sup>+</sup> T (EM), KLRG1 <sup>+</sup> Tbet <sup>+</sup> PD1 <sup>+</sup>                                        |
| 15      | CD8 <sup>+</sup> T       | CD8 <sup>+</sup> T (CM)                          | 15: CD8 <sup>+</sup> T (CM), KLRG1 <sup>+</sup> PD1 <sup>+</sup>                                                          |
| 18      | CD8 <sup>+</sup> T       | CD8 <sup>+</sup> T (EM)                          | 18: CD8 <sup>+</sup> T (EM), KLRG1 <sup>+</sup> Tbet <sup>+</sup>                                                         |
| 4       | γδT                      | γδT (CD4 <sup>-</sup> CD8 <sup>-</sup> )         | 4: γδT (CD4 <sup>-</sup> CD8 <sup>-</sup> ), CCR7 <sup>+</sup> CD27 <sup>+</sup> KLRG1 <sup>+</sup>                       |
| 22      | γδT                      | γδT (CD4 <sup>-</sup> CD8 <sup>-</sup> )         | 22: γδT (CD4 <sup>-</sup> CD8 <sup>-</sup> ), CD45RO <sup>+</sup> CD27 <sup>+</sup> CD161 <sup>+</sup> KLRG1 <sup>+</sup> |
| 23      | γδT                      | γδT (CD8 <sup>+</sup> )                          | 23: γδT (CD8 <sup>+</sup> ), CD56 <sup>+</sup> KLRG1 <sup>+</sup>                                                         |
| 28      | γδT                      | γδT (CD4 <sup>-</sup> CD8 <sup>-</sup> )         | 28: γδT (CD4 <sup>-</sup> CD8 <sup>-</sup> ), KLRG1 <sup>-</sup>                                                          |
| 26      | Myeloid                  | Monocytes (CD14 <sup>+</sup> CD16 <sup>-</sup> ) | 26: Classical Monocytes                                                                                                   |
| 29      | Myeloid                  | Monocytes (CD14 <sup>+</sup> CD16 <sup>-</sup> ) | 29: Classical Monocytes                                                                                                   |
| 34      | Myeloid                  | Monocytes (CD14 <sup>+</sup> CD16 <sup>-</sup> ) | 34: Classical Monocytes                                                                                                   |
| 42      | Myeloid                  | DC (Myeloid)                                     | 42: mDC                                                                                                                   |
| 43      | Myeloid                  | DC (Plasmacytoid)                                | 43: pDC                                                                                                                   |
| 45      | Myeloid                  | DC (Myeloid)                                     | 45: mDC, CD16 <sup>+</sup>                                                                                                |
| 20      | NK/ILC                   | ILC (Type 2)                                     | 20: ILC2                                                                                                                  |
| 32      | NK/ILC                   | NK (CD56 <sup>lo</sup> CD16 <sup>+</sup> )       | 32: NK (CD56 <sup>lo</sup> CD16 <sup>+</sup> )                                                                            |
| 33      | NK/ILC                   | NK (CD56 <sup>lo</sup> CD16 <sup>-</sup> )       | 33: NK (CD56 <sup>lo</sup> CD16 <sup>-</sup> )                                                                            |
| 39      | NK/ILC                   | NK (CD56 <sup>hi</sup> )                         | 39: NK (CD56 <sup>hi</sup> ), CD11c <sup>+</sup> CD27 <sup>+</sup>                                                        |
| 40      | NK/ILC                   | NK (CD56 <sup>lo</sup> CD16 <sup>+</sup> )       | 40: NK (CD56 <sup>lo</sup> CD16 <sup>+</sup> ), CD38 <sup>+</sup> NKp46 <sup>+</sup> CD122 <sup>+</sup>                   |
| 12      | Unconventional αβT cells | Double negative (DN) T                           | 12: DNT, CD28 <sup>+</sup> CTLA4 <sup>+</sup>                                                                             |



|           |                                         |            |                                                                    |
|-----------|-----------------------------------------|------------|--------------------------------------------------------------------|
| <b>21</b> | Unconventional<br>$\alpha\beta$ T cells | MAIT       | 21: MAIT, CD45RO <sup>+</sup> KLRG1 <sup>+</sup> CCR6 <sup>+</sup> |
| <b>27</b> | Unconventional<br>$\alpha\beta$ T cells | NKT        | 27: NKT, CCR7 <sup>+</sup> CD27 <sup>+</sup>                       |
| <b>25</b> | Unassigned                              | Unassigned | 25: Unassigned                                                     |
| <b>41</b> | Unassigned                              | Unassigned | 41: Unassigned                                                     |

FlowSOM clusters are sorted by lineage and cluster number.

**Table S3. Flow Cytometry Antibody Panels.**

| Panel | No. | Target         | Fluorochrome | Dilution | Clone        | Source         | Catalogue     |
|-------|-----|----------------|--------------|----------|--------------|----------------|---------------|
| 1     | 1   | IL-2           | FITC         | 25       | 5344         | BD Biosciences | 340448        |
| 1     | 2   | IL-4           | PE           | 100      | 3010.211     | BD Biosciences | 340451        |
| 1     | 3   | IL-5           | PE           | 100      | TRFK5        | Biolegend      | 504304        |
| 1     | 4   | IL-13          | PE           | 100      | JES10-5A2    | Biolegend      | 501903        |
| 1     | 5   | CD4            | Percp-eF710  | 400      | SK3          | eBioscience    | 9046-0047-025 |
| 1     | 6   | TNF            | PE-Cy7       | 1000     | MAb11        | eBioscience    | 25-7349       |
| 1     | 7   | IL-10          | APC          | 250      | JES3-19F1    | BD Biosciences | 554707        |
| 1     | 8   | CD3            | APC-eF780    | 800      | UCHT1        | eBioscience    | 47-0038-42    |
| 1     | 9   | IFN $\gamma$   | BV421        | 1000     | 4S.B3        | Biolegend      | 502531        |
| 2     | 1   | CCR7           | BV785        | 40       | G043H7       | Biolegend      | 353230        |
| 2     | 2   | CD123          | APC          | 50       | AC145        | Miltenyi       | 130-090-901   |
| 2     | 3   | BDCA2          | PerCPCy5.5   | 200      | 201A         | BioLegend      | 354209        |
| 2     | 4   | HLA-DR         | BUV605       | 300      | G46-6        | BD Biosciences | 562844        |
| 2     | 5   | CD11c          | PE-Cy7       | 400      | Bu15         | Biolegend      | 337216        |
| 2     | 6   | CD86           | PE           | 400      | 2331 (FUN-1) | BD Pharmingen  | 555658        |
| 2     | 7   | CD80           | V450         | 500      | L307.4       | BD Horizon     | 560442        |
| 2     | 8   | IL12           | BV421        | 200      | C8.6         | BD Horizon     | 565023        |
| 2     | 9   | IFN $\alpha$   | PE-Vio615    | 50       | REA1013      | Miltenyi       | 130-116-875   |
| 2     | 10  | TNF $\alpha$   | BUV395       | 50       | MAb11        | BD Horizon     | 563996        |
| 2     | 11  | IL1b           | FITC         | 50       | JK1B-1       | BioLegend      | 508206        |
| 3     | 1   | CD4            | cfYG584      | 750      | SK3          | CYTEK          | SKU R7-20041  |
| 3     | 2   | CD25           | BUV563       | 750      | 2A3          | BD Biosciences | 612918        |
| 3     | 3   | CD45RA         | BUV496       | 750      | 5H9          | BD Biosciences | 741182        |
| 3     | 4   | CD45RO         | BUV805       | 500      | UCHL1        | BD Biosciences | 748367        |
| 3     | 5   | CD3            | BUV395       | 500      | UCHT1        | BD Biosciences | 563546        |
| 3     | 6   | PD1            | BV750        | 375      | EH12.1       | BD Biosciences | 747446        |
| 3     | 7   | CD127          | R718         | 100      | HIL-7R-M21   | BD Biosciences | 566967        |
| 3     | 8   | TNFR2          | PE           | 20       | 22235        | R&D Systems    | FAB226P       |
| 3     | 9   | GITR           | FITC         | 20       | 110416       | R&D Systems    | FAB689F       |
| 3     | 10  | IL4            | BUV737       | 750      | MP4-25D2     | BD Biosciences | 612835        |
| 3     | 11  | CTLA4          | PE-Cy5       | 300      | BNI3         | BD Biosciences | 555854        |
| 3     | 12  | IL10           | PerCPef710   | 250      | JES3-9D7     | Thermofisher   | 46-7108-42    |
| 3     | 13  | FoxP3          | PE Dazzle    | 75       | 206D         | Biolegend      | 320126        |
| 3     | 14  | TGFb1<br>(LAP) | PerCP5.5     | 100      | TW4-2F8      | BioLegend      | 349611        |

Panel 1 was used for the analysis of antigen-specific cytokine-producing CD4<sup>+</sup>T cells (Fig. 4 B, Table 1)

Panel 2 was used for the analysis of cytokine-producing pDC after R848 stimulation (Fig. 2 G)

Panel 3 was used for functional analysis of regulatory T cells (Fig. 3 J).

Table S4. Characteristics and helminth infection status of Flores residents.

| Subject Characteristics |     |        | PCR (Ct value) <sup>#</sup> |      |      |     | Infection status |
|-------------------------|-----|--------|-----------------------------|------|------|-----|------------------|
| No.                     | Age | Sex    | Hw                          | Al   | Tt   | Ss  |                  |
| 1                       | 18  | Male   | 32.2                        | 31.8 | 30   | Neg | Hw and other     |
| 2                       | 18  | Male   | 28.3                        | Neg  | 33.4 | Neg | Hw and other     |
| 3                       | 47  | Male   | 30.2                        | Neg  | Neg  | Neg | Hw only          |
| 4                       | 55  | Male   | 28.5                        | 30.2 | 37.9 | Neg | Hw and other     |
| 5                       | 36  | Female | 27.8                        | 25.6 | 28.5 | Neg | Hw and other     |
| 6                       | 56  | Male   | 38.5                        | Neg  | 35.6 | Neg | Hw and other     |
| 7                       | 28  | Female | 31.1                        | Neg  | Neg  | Neg | Hw only          |
| 8                       | 24  | Female | 34.4                        | Neg  | Neg  | Neg | Hw only          |
| 9*                      | 18  | Male   | 28                          | Neg  | Neg  | Neg | Hw only          |
| 10*                     | 50  | Male   | 29                          | Neg  | Neg  | Neg | Hw only          |
| 11*                     | 31  | Female | 29                          | Neg  | Neg  | Neg | Hw only          |

<sup>#</sup> Samples were defined as negative by a Ct value of 50. The lower the Ct value, the higher the amount of DNA. \* Subject 9, 10, and 11 were included in the analyses corresponding to Fig. 2 G and Fig. 3 J. Flores residents in other analyses correspond to subject 1 to 8. Age of individuals is given in years. Abbreviations: Ct = Cycle threshold; Al = *Ascaris lumbricoides*; Hw = Hookworm; Tt = *Trichuris trichiura*; Ss = *Strongyloides stercoralis*.

Table S5. **Software and algorithms.**

| <b>Software and algorithms</b>          | <b>Version</b> | <b>Reference</b>                                                                                    |
|-----------------------------------------|----------------|-----------------------------------------------------------------------------------------------------|
| The R Project for Statistical Computing | 4.0.2          | <a href="https://www.r-project.org/">https://www.r-project.org/</a>                                 |
| cytofclean                              | 1.0.3          | <a href="https://github.com/JimboMahoney/cytofclean">https://github.com/JimboMahoney/cytofclean</a> |
| ComplexHeatmap                          | 2.12.1         | <a href="https://bioconductor.org/">https://bioconductor.org/</a>                                   |
| CATALYST                                | 1.20.1         | <a href="https://bioconductor.org/">https://bioconductor.org/</a>                                   |
| cyCombine                               | 0.2.13         | <a href="https://github.com/biosurf/cyCombine">https://github.com/biosurf/cyCombine</a>             |
| FlowSOM                                 | 2.4.0          | <a href="https://bioconductor.org/">https://bioconductor.org/</a>                                   |
| mixOmics                                | 6.20.0         | <a href="https://bioconductor.org/">https://bioconductor.org/</a>                                   |
| vegan                                   | 2.6.2          | <a href="https://cran.r-project.org/">https://cran.r-project.org/</a>                               |
| emmeans                                 | 1.7.5          | <a href="https://cran.r-project.org/">https://cran.r-project.org/</a>                               |
| lme4                                    | 1.1.30         | <a href="https://cran.r-project.org/">https://cran.r-project.org/</a>                               |
| lmerTest                                | 3.1.3          | <a href="https://cran.r-project.org/">https://cran.r-project.org/</a>                               |
| nlme                                    | 3.1.159        | <a href="https://cran.r-project.org/">https://cran.r-project.org/</a>                               |
| tidyverse                               | 1.3.2          | <a href="https://cran.r-project.org/">https://cran.r-project.org/</a>                               |
| OMIQ                                    | N/A            | <a href="http://www.omiq.ai">www.omiq.ai</a>                                                        |
| FlowJo                                  | v10            | <a href="https://www.flowjo.com/solutions/flowjo">https://www.flowjo.com/solutions/flowjo</a>       |
| Cytosplore                              | 2.3.1          | <a href="https://www.cytosplore.org/">https://www.cytosplore.org/</a>                               |
| FI-tSNE                                 | 1.2.1          | <a href="https://github.com/KlugerLab/Flt-SNE">https://github.com/KlugerLab/Flt-SNE</a>             |
